# Supplementary material
Source: Research Square preprint supplement (doi:10.21203/rs.3.rs-9933015/v1)
Supplement: Supplementary file 1 [file 8361721456d86df49d694a03.docx]

**Supplementary Table 1.** Mean (standard deviation, SD) cost per treatment-seeking visit before or between trial visits and number of visits reported from day 0 to day 21 by country and overall. Some patients reported visiting multiple locations; these could be at multiple time points. All costs are reported in 2024 United States dollars.

| **Location visited** | | **Cambodia** | | **Ethiopia** | | **Indonesia** | | **Pakistan** | | **Overall** |
| --- | --- | --- | --- | --- | --- | --- | --- | --- | --- | --- |
| **Drug shop – N** | **9** | | **1** | | **35** | | **20** | | **65** | |
| Mean (SD) hours spent | 0.4 (0.4) | | 0.5 (N/A) | | 0.3 (0.2) | | 1.0 (1.1) | | 0.5 (0.7) | |
| Mean (SD) treatment cost | 3.05 (4.06) | | 1.44 (N/A) | | 1.92 (2.36) | | 2.27 (5.06) | | 2.18 (3.58) | |
| Mean (SD) transport cost | 0.84 (1.24) | | 0 (N/A) | | 0.29 (0.57) | | 0.15 (0.32) | | 0.32 (0.67) | |
| **This health facility – N** | **5** | | **0** | | **4** | | **9** | | **18** | |
| Mean (SD) hours spent | 0.4 (0.2) | | - | | 0.6 (0.4) | | 1.4 (0.5) | | 0.9 (0.6) | |
| Mean (SD) treatment cost | 3.17 (4.72) | | - | | 1.62 (3.23) | | 0.34 (0.95) | | 1.41 (3.01) | |
| Mean (SD) transport cost | 1.44 (1.18) | | - | | 0.24 (0.31) | | 0.46 (0.92) | | 0.69 (0.99) | |
| **Private clinic – N** | **17** | | **2** | | **100** | | **46** | | **165** | |
| Mean (SD) hours spent | 0.5 (0.5) | | 1.0 (0.0) | | 1.2 (3.0) | | 1.9 (1.2) | | 1.3 (2.5) | |
| Mean (SD) treatment cost | 27.11 (31.57) | | 0.77 (0.07) | | 10.53 (13.33) | | 4.60 (6.03) | | 10.47 (15.93) | |
| Mean (SD) transport cost | 2.62 (3.05) | | 0.51 (0.44) | | 0.31 (0.48) | | 0.73 (1.33) | | 0.67 (1.42) | |
| **Public clinic – N** | **25** | | **148** | | **25** | | **32** | | **230** | |
| Mean (SD) hours spent | 1.2 (0.9) | | 1.3 (0.7) | | 0.6 (1.3) | | 1.2 (0.9) | | 1.2 (0.9) | |
| Mean (SD) treatment cost | 4.08 (10.74) | | 0.75 (0.56) | | 3.91 (3.73) | | 0.59 (1.23) | | 1.43 (3.97) | |
| Mean (SD) transport cost | 3.85 (5.26) | | 0.59 (0.40) | | 0.81 (1.89) | | 0.10 (0.27) | | 0.90 (2.12) | |
| **Hospital – N** | **35** | | **200** | | **3** | | **40** | | **278** | |
| Mean (SD) hours spent | 1.5 (4.0) | | 2.1 (1.1) | | 82.7 (136.3) | | 3.5 (7.6) | | 3.1 (14.7) | |
| Mean (SD) treatment cost | 0.38 (2.22) | | 1.10 (0.93) | | 5.71 (9.06) | | 6.32 (13.04) | | 1.81 (5.43) | |
| Mean (SD) transport cost | 3.87 (3.11) | | 0.67 (0.40) | | 1.08 (1.87) | | 0.57 (1.86) | | 1.07 (1.72) | |
| **Traditional healer - N** | **0** | | **0** | | **2** | | **0** | | **2** | |
| Mean (SD) hours spent | - | | - | | 1.0 (0.0) | | - | | 1.0 (0.0) | |
| Mean (SD) treatment cost | - | | - | | 6.14 (5.03) | | - | | 6.14 (5.03) | |
| Mean (SD) transport cost | - | | - | | - | | - | | - | |
| **Village malaria worker - N** | **144** | | **0** | | **0** | | **0** | | **144** | |
| Mean (SD) hours spent | 0.5 (0.6) | | - | | - | | - | | 0.5 (0.6) | |
| Mean (SD) treatment cost | 0.00 (0.00) | | - | | - | | - | | 0.00 (0.00) | |
| Mean (SD) transport cost | 2.95 (3.51) | | - | | - | | - | | 2.95 (3.51) | |
| **Other location - N** | **4** | | **0** | | **3** | | **4** | | **11** | |
| Mean (SD) hours spent | 0.2 (0.2) | | - | | 0.5 (0.4) | | 1.6 (1.6) | | 0.8 (1.1) | |
| Mean (SD) treatment cost | 0.63 (1.27) | | - | | 1.48 (1.32) | | 1.44 (1.21) | | 1.16 (1.20) | |
| Mean (SD) transport cost | 1.40 (1.63) | | - | | 0.00 (0.00) | | 0.00 (0.00) | | 0.51 (1.14) | |

N/A – not applicable; SD – standard deviation

**Supplementary Table 2.** Number (percentage) reporting length of time spent travelling from the patient’s home to the health centre where enrolled in the trial by country.

| **Length of time** | **Cambodia**  **N=220** | **Ethiopia N=350** | **Indonesia N=150** | **Pakistan N=240** | **Overall N=960** |
| --- | --- | --- | --- | --- | --- |
| Less than 30 minutes | 59 (27%) | 12 (3%) | 122 (81%) | 49 (20%) | 242 (25%) |
| 30 minutes to less than 60 minutes | 70 (32%) | 304 (87%) | 20 (13%) | 26 (11%) | 420 (44%) |
| 1 hour to less than half a day | 89 (40%) | 34 (10%) | 8 (5%) | 164 (68%) | 295 (31%) |
| Half a day to 1 day | 2 (0.9%) | 0 (0%) | 0 (0%) | 1 (0.4%) | 3 (0.3%) |

**Supplementary Table 3.** Total costs of screening for glucose-6-phosphate dehydrogenase (G6PD) deficiency collected for the EFFectiveness of nOvel approaches to Radical cure with Tafenoquine and primaquine (EFFORT) trial. These costs are broken down into the cost categories of equipment, consumables, and staff. Patient throughputs were used to calculate the cost per person. All costs are in 2024 United States dollars.

|  | **Location** | | | | **Source** |
| --- | --- | --- | --- | --- | --- |
|  | **Cambodia** | **Ethiopia** | **Indonesia** | **Pakistan** |  |
| **Annual throughput** | 117 | 1814 | 134 | 1872 | EFFORT study records |
| **Equipment cost** | 0.91 | 0.07 | 1.66 | 0.10 | Total equipment cost per person |
| SD Biosensor unit cost | 300 | 300 | 300 | 300 | Volume price agreement |
| Expected lifetime in years | 3 | 3 | 3 | 2 | EFFORT study records |
| Annualized cost per SD Biosensor | 106.06 | 106.06 | 106.06 | 156.78 | Annualised price based on expected lifetime |
| SD Biosensor cost per person |  | 0.06 | 0.79 | 0.08 | Calculated from above |
| Other equipment cost per person | 0.00 | 0.01 | 0.86 | 0.02 | EFFORT study records for desk, trash can, chair, blood tube rack, micropipette, etc |
| **Consumables cost** | 4.55 | 3.81 | 4.36 | 3.69 | Total consumables cost per person |
| Test strip | 3.27 | 3.27 | 3.27 | 3.27 | Volume price agreement |
| Set of two quality control tests | 3.00 | 3.00 | 3.00 | 3.00 | Volume price agreement |
| Quality control cost per person | 0.98 | 0.05 | 0.85 | 0.06 | Includes cost of two test strips and a set of quality control tests conducted once per month divided by patient throughput |
| Micropipette tips | 0.06 | 0.07 | 0.09 | 0.04 | EFFORT study records (per person cost) |
| Gloves | 0.23 | 0.37 | 0.12 | 0.29 | EFFORT study records (per person cost) |
| Batteries | 0.01 | 0.04 | 0.02 | 0.02 | EFFORT study records (per person cost) |
| **Staff cost** | 0.59 | 0.14 | 0.13 | 0.09 | Total staff cost per person |
| **Total cost** | **6.05** | **4.02** | **6.15** | **3.88** | **Sum of all cost categories** |
